# Supplementary material for: Differentially expressed extracellular vesicle, exosome and non-exosome miRNA profile in high and low tick-resistant beef cattle
Source: Research Square preprint supplement (doi:10.21203/rs.3.rs-929210/v1), 2021-09-23
Supplement: Supplementary file 1 [file eb09ae55eb8da972bdab9883.xlsx]

## Sheet: mirnet_enrichment
Pathway	Total	Expected	Hits	Pval	stringsAsFactor
Ras signaling pathway	237	0.423	4	0.000639	FALSE
Alanine, aspartate and glutamate metabolism	36	0.0642	2	0.0018	FALSE
Pathways in cancer	402	0.717	4	0.0045	FALSE
RIG-I-like receptor signaling pathway	78	0.139	2	0.00821	FALSE
GABAergic synapse	87	0.155	2	0.0101	FALSE
Prostate cancer	87	0.155	2	0.0101	FALSE
NF-ķB signaling pathway	92	0.164	2	0.0113	FALSE
Glutamatergic synapse	115	0.205	2	0.0173	FALSE
PI3K-Akt signaling pathway	351	0.626	3	0.0223	FALSE
Measles	141	0.251	2	0.0253	FALSE
Nitrogen metabolism	17	0.0303	1	0.0299	FALSE
Arginine biosynthesis	20	0.0357	1	0.0351	FALSE
Vitamin digestion and absorption	22	0.0392	1	0.0386	FALSE
Influenza A	179	0.319	2	0.0393	FALSE
Chemokine signaling pathway	188	0.335	2	0.043	FALSE
Glyoxylate and dicarboxylate metabolism	27	0.0482	1	0.0471	FALSE
